# Supplementary material
Source: PubMed Central journal article supplement (PMC1871872)

**A**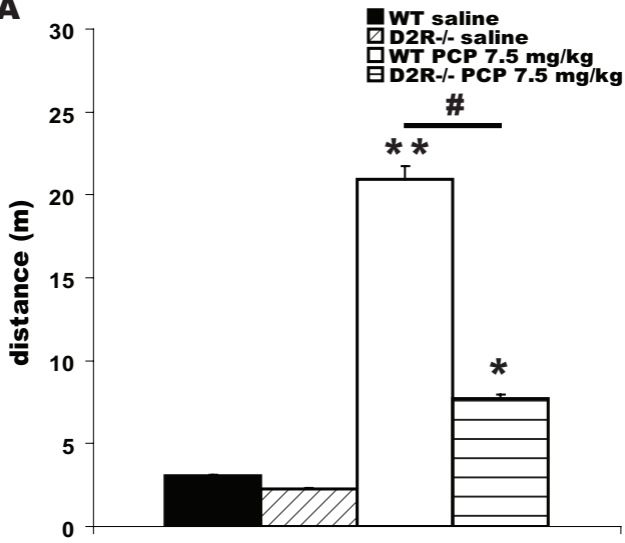**B**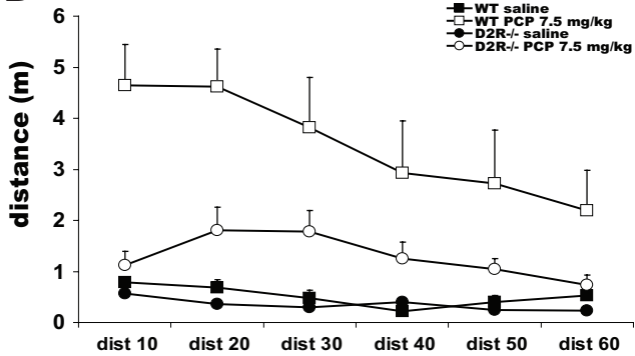

Supplement: pnas_0610790104_1.pdf [file pnas_0610790104_1.pdf]

# Zif268 mRNA expression

## Striatum

###

■ D2R+/+  
□ D2R-/-

\*\*\*

(% of WT control)

200

100

0

Sal-Sal

Sal-coc

MK801-Sal

MK801-coc

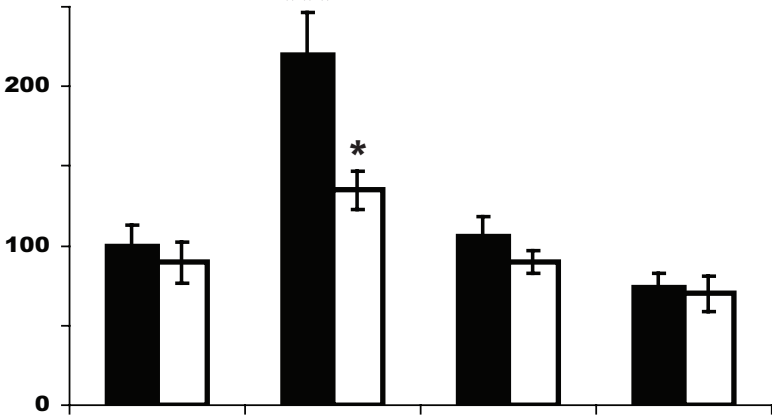

Supplement: pnas_0610790104_2.pdf [file pnas_0610790104_2.pdf]
